# Supplementary material
Source: Springer Nature journal article supplement (https://www.springermedizin.de/resource/supplementary/12943_2009_562_MOESM6_ESM.pdf/9554976)

**A****0 h****20 h****Control**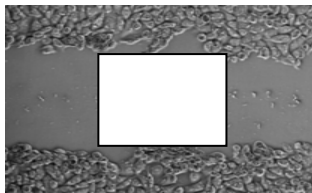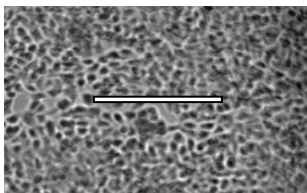**SFN 5  $\mu$ M**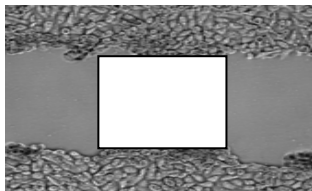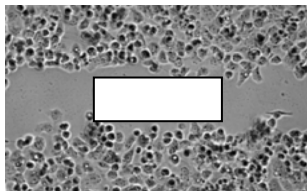**SFN 10  $\mu$ M**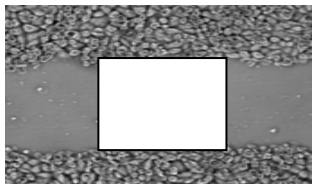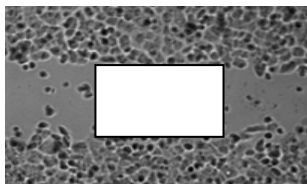**B**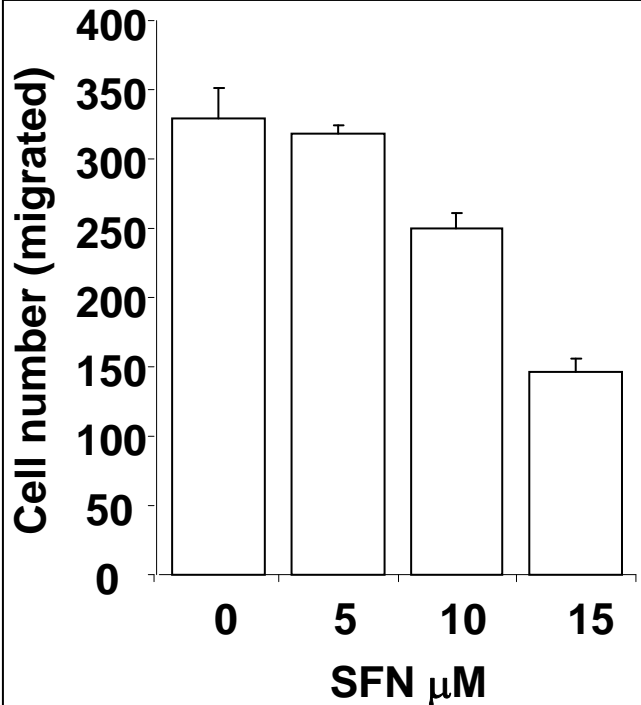

Supplement: MOESM6 [file 9554976]
